# Supplementary material
Source: publisher site journal article supplement (https://www.dovepress.com/article/445160)
Supplement: Supplementary file 1 [file get_supplementary_file.php]

**Supplemental Appendix: DELTA System Methods and Validation Results**

Table of Contents

[1. What is the DELTA System? 1](#_Toc107395618)

[2. Statistical Methods available in DELTA: 1](#_Toc107395619)

[3. Approach to validation of DELTA statistical methods: 4](#_Toc107395620)

[4. Validation Study Results: 6](#_Toc107395621)

[Test 1 - Synthetic Dataset Analyses: 6](#_Toc107395622)

[Test 2 – Replication of Published Data Analyses: 7](#_Toc107395623)

[5. References: 9](#_Toc107395624)

# 1. What is the DELTA System?

DELTA (Data Extraction and Longitudinal Trend Analysis system) is a suite of open-source active surveillance software tools designed to support continuous monitoring of high quality clinical data sources. The tool utilizes open source technologies to provide a web-based graphical user interface developed using JavaScript (ExtJS framework), a Java-based Application Programming Interface (API), a MySQL database and an analytics engine written in the R programming language. DELTA allows the user to design an analysis by specifying a set of parameters and dataset to be used, then execute the analysis. Parameters include a desired confidence interval to generate an alerting threshold and a time intervals for the analysis. When the application detects an elevated outcome rate for a given exposure, alerts are generated and made available to designated users. DELTA incorporates a variety of frequentist methods, implemented using validated R packages, to perform risk-adjusted prospective surveillance analyses, including survival studies, sequential analyses and extensive propensity matching algorithms. DELTA uses a modular approach to statistical analysis that facilitates further expansion, and can support a number of prospective safety analyses simultaneously. DELTA has been previously validated for prospective monitoring of clinical registries1-3 and clinical data sets4, 5, and is available as an open source software package with associated technical documentation. In all previous DELTA projects, the safety surveillance analyses were executed in a local server environment. For the current project, the DELTA components were modified to support cloud-based deployment and were formally evaluated using both simulated as well as historical clinical data.

# 2. Statistical Methods available in DELTA:

DELTA provides seven statistical methods to support prospective, active surveillance of accruing clinical datasets. These include multivariate logistic regression using a non-parsimonious model (LR), logistic regression with automated variable selection (LR-AVS), propensity score matching (PSM), Inverse Probability Treatment Weighting (IPTW), Weighting by the Odds (WBO), Sequential Probability Ratio Testing (SPRT) and propensity score matched survival (PSM-Survival). See details of the DELTA implementation for each of these methods described below.

a. Logistic Regression (LR): Logistic regression is used to estimate the relationship between one or more independent variables and a binary (dichotomous) outcome variable.6 The standard LR model permits the user to select the covariates to be included for adjustment, from among all available covariates in the dataset (non-parsimonious). LR seeks to identify a model that best fits the relationship between a single pre-defined dependent, dichotomous variable and one or more independent variables. This method generates coefficients, standard errors, and significance levels which can be applied to a logit or probit transformation to estimate the probability of the outcome, given the covariate distribution for a particular exposure. The non-parsimonious implementation of LR allows users to exclude covariates that the model identifies as irrelevant to the outcome.

In a two-step process, the model is created using the dependent variable and covariates, then trained and fitted against a specified subset of the available data. The amount of data used to train the LR model is user defined, and can be a temporal subset of the available data (e.g. first quarter, first year, etc.), or a training dataset can be manually specified. If users have configured a temporal training data set, the study data is what remains in the time period after the training data, until the end of the study period. After the model is trained, the second step in the analysis applies the model to the study dataset to obtain a predicted probability for each observation.

b. Logistic Regression with Automated Variable Selection (LR-AVS): Using the LR-AVS implementation, Least Absolute Shrinkage and Selection Operator (LASSO) methodology is used to modulate the influence of model covariates.7 A LASSO coefficient is applied to each covariate, and adjusted to increase, decrease, or by setting the coefficient to 0, completely attenuate the influence of that specific variable. Variable selection is achieved by removing covariates with a LASSO coefficients of 0. The LR-AVS and LR techniques are similar except that LR-AVS applies variable selection to identify which covariates are to be included in the model.

c. Propensity Score Matching: The propensity score model (PSM) methods (propensity matching, WBO, and IPTW) implemented within DELTA share a common methodology in that each seeks to estimate outcome frequency by first calculating propensity scores (PS) for individual patients. Propensity scores based on a patient’s clinical characteristics describe the probability of exposure to a treatment of interest as compared to an alternative treatment.8, 9 The propensity matching and WBO methods seek to estimate the “average effect of the treatment on the treated” (ATT).10, 11 ATT Is what would be expected if everyone in the treated group received the treatment, compared to if no one in the treated group received the treatment. Matching seeks to identify a control case with the most similar propensity score for each treated case.

DELTA provides a variety of configurable parameters in regards to matching patients based on propensity scores. In order to match patients with differing PS values, a pre-specified difference between scores, referred to as a caliper width12, can be defined by the user within DELTA. Alternatively, matching can be done on the logit of the propensity score, using an optimal width defined as a proportion of 0.2 of the pooled standard deviation of the logit of the propensity score.12, 13 Patient matching ratios of 1: n*,* with or without replacement, can be defined by the user, as well as selecting a random match order, or a “rarest first” approach in which patients with the fewest possible matches are matched first. When patients have multiple matches DELTA can be configured to randomly match patients or match based on closest/nearest PS. The treatment effect is derived from the odds ratio for the treatment variable in a generalized linear model (GLM) with a logit link function wherein the outcome and treatment are used as the dependent and independent variables, respectively. The model uses only data for the matched treated and control cases.

d. Inverse Probability Treatment Weighting (IPTW): Unlike the propensity matching and WBO methods, the IPTW method uses propensity scores to estimate the average treatment effect (ATE) 11 with the use of weights. Each case is weighted by the inverse probability of receiving the treatment that they actually received. Cases in the treated group are assigned a weight equal to 1/PS, and cases in the control groups are assigned a weight equal to 1/ (1-PS).14 A generalized linear model using a logit link function and the assigned weights is used to derive the treatment effects as the odds ratio for the treatment variable. The model uses the outcome and treatment as the dependent and independent variable, respectively. Unlike the PSM method where data is limited to only the matched population, IPTW uses all cases. As IPTW may provide biased estimates in cases where the weights are very large and highly influential, DELTA provides users with the ability to stabilize and/or trim these weights.11 Stabilization is achieved by multiplying the treated and control group weights by a constant derived separately for the treated and control groups to reduce the variability in the weights.11

For the treated group, the constant is equal to the sum of PS divided by the total number of treated cases, whereas for the control group, the constant equals the sum of (1-PS) divided by the total number of control cases.11 The second technique to control for extreme weights is trimming, which is achieved by truncating weights below and above cutoff points set as percentiles of the weight distribution, usually 5th and 95th respectively.

e. Weighting by the Odds (WBO): In WBO, each treated case has a weight equal to 1, whereas the control case has a weight equal to the odds scale of the propensity score which is equal to PS/ (1-PS).11 Control cases that have a PS close to the PS of treated cases receive a high weight, whereas control cases with PS distant from the PS of the treated group get a low weight. Because both the treated and control groups are weighted in respect to the treated group, WBO estimates ATT.11 A generalized linear model with a logit link function and the assigned weights, is used to derive the treatment effects as the odds ratio for the treatment variable. The model uses the outcome and treatment as the dependent and independent variable respectively. Unlike matching where data is limited to only the matched population, WBO uses all case data.

f. Sequential Probability Ratio Testing (SPRT): SPRT detects event rates by evaluating units of analysis sequentially over time, and seeks to identify if event rates exceed an accepted or baseline event rate, given an odds ratio (OR), and Type I and Type II errors, for a specific population.15, 16 After each sequential case is evaluated, error adjustments are incorporated and DELTA attempts to determine if an event rate has been exceeded in a specific patient group. The specific risk-adjusted SPRT implementation within DELTA is based on previous work by Matheny et al. 16 The control limits are defined by formulas 1 and 2, in which the cumulative log-likelihood ratio values for accepting the null or alternative hypothesis (represented by *h*0 and *h*1, respectively) are functions of the odds ratio (OR), Type I error (α) and Type II error (β).15

Formula 1: h0=ln ((1−α)/β)/ln (OR)

Formula 2: h1=ln ((1− β)/ α)/ln (OR)

g. Propensity score matched survival (PSM-Survival): PSM-Survival relies on an initial step in which propensity score matching is performed and the treated and control cohorts are identified. Using DELTA, a user specifies parameters required for propensity score matching in addition to the survival-based parameters which include a dichotomous outcome variable, and survival duration or calendar dates when the outcome occurred. Following the matching procedure, two Kaplan-Meier survival curves are estimated for each of the matched treated and control cohorts. The Kaplan-Meier estimator determines the fraction of cases surviving (i.e. without developing the outcome of interest) during a specified time period after treatment.17 The difference in the two survival curves after a given duration is determined by statistically testing the null hypothesis using the Log-rank test.17A p-value of <0.05 is used to determine presence of a significant difference between the curves.

# 3. Approach to validation of DELTA statistical methods:

Two tests were performed in an effort to validate DELTA’s statistical methods deployed in the cloud computing environment. In the first exercise (Test 1), five synthetic datasets were developed based on covariate and outcome distributions from published clinical studies of coronary stents by a collaborating research team at Vanderbilt University Medical Center, who were not involved in the DELTA validation testing. These synthetic datasets were then analyzed in a local instance of DELTA by individuals blinded to the underlying data distributions. In the second validation exercise (Test 2), we repeated a comprehensive safety analysis of coronary stents that we had previously published18, by using the original study data analyzed by DELTA in the cloud computing environment. The results from DELTA for both tests were then compared to the known results (synthetic data ‘truth’ for Test 1, and previously published results for Test 2) in order to ascertain the system’s accuracy.

**Data Sources**: Test 1 included five artificially created datasets, representing two healthcare organizations, which simulate exposure to one of two treatment options (Stent A or B). Each dataset contained between 20,000 and 30,000 patients. Three adverse events (mortality, repeat procedures, and hospital readmission) were injected into the simulated datasets based on an underlying model for each outcome derived from clinical trial data. Up to 5% of data were removed at random to further reproduce real world conditions and test the capabilities of DELTA.

Test 2 leveraged the data used for the original study by Drozda et al 18 to investigate freedom from death at one year following exposure to a coronary drug-eluting stent (DES) or bare-metal stent (BMS). These data were sourced from Mercy Health’s unique device identifier enriched (UDIR) database for procedures performed between November 1, 2012 and October 26, 2013 in which a coronary stent was implanted.

**Study Design:**  In order to verify fidelity of data integrity and the analytic methods being tested, each DELTA analysis was performed on both a local and a cloud installation of DELTA, and the results compared with each other as well as with the underlying simulated data distributions for each dataset. Descriptive statistics were calculated to assess that the data ingested by DELTA matched the original data source and were consistent across the local and cloud environments. After completing local and cloud analyses, the source data distributions were unblinded, and the results from both DELTA environments were compared to the underlying true data distributions. Pre-specified thresholds were required to conclude successful validation of Test 1. The calculated covariate distributions were required to match the true values within 2% of the known values, the calculated adjusted odds ratios were required to be within 5% of the true value, and the DELTA local and cloud environments produce results that are within 2% of one another.

For Test 2, risk adjustment using propensity-matched survival analysis was used to approximate the methods employed by Drozda in the original, published, study of the safety of coronary stents. Validation was considered achieved if DELTA identified a reduction in mortality associated with the use of drug eluting stents (DES) as compared to bare metal stents (BMS), and the adjusted hazard ratio computed in DELTA is contained within the confidence interval reported by Drozda et al.18 In addition to the propensity matched survival analysis, an IPTW analysis was performed and descriptive statistics were calculated for Test 2 study data and compared to the published data distributions.

Missing data in both Test 1 and Test 2 were handled using univariate imputation rules, assuming absence of a clinical comorbidity for dichotomous variables.

**Statistical Methodology:** In Test 1, six analytic methods were executed against each of the five datasets, for a total of 30 analyses. Analyses were configured independently on the local and cloud instances of DELTA, and confirmed to match before completing any analysis. Common parameters shared by all analyses included:

1. Independent variables (i.e. covariates), defined as the patient characteristics age, gender, BMI, diabetes, chronic lung disease, hypertension, peripheral arterial disease, dialysis, smoking history, prior percutaneous coronary intervention (PCI), symptoms at presentation, emergent status, aspirin exposure, warfarin exposure, number of affected vessels, and time under fluoroscopy.
2. Dichotomous outcomes, including mortality at 30 days, reoperation, and readmission.
3. Dichotomous treatment exposure to device of interest, designated as “Device B”
4. The procedure date, used as a sequencer data field that provides the occurrence date for the treatment.

In addition to the general parameters above, each analytic method requires further configuration, using DELTA based parameters, as described below.

LR and LR-AVS: Each analysis was configured to utilize approximately half of the available data when building predictive statistical models and the remaining half was for evaluating outcomes. Automated variable selection (AVS) was enabled in LR-AVS and disabled in LR.

PSM: A matching ratio of 1:1, without replacement, utilizing a random matching order and closest match type was configured, along with a caliper width of was 0.2 of the standard deviation of the logit of the PS. AVS was enabled and the treatment model based on a logit link function.

IPTW: Trimming was allowed at the 5th and 95th percentiles and stabilization of weights was disabled. AVS was enabled and the treatment model based on a logit link function.

WBO: AVS was enabled and the treatment was model based on a logit link function.

SPRT: The alpha and beta error values were configured to 0.1, the odds ratio to 1.5, and AVS was enabled.

In Test 2, the covariates included risk factors for mortality at one year, based on a previously validated risk adjustment model for coronary stent procedures- age >65 years, gender, race, marital status, alcohol use, illicit drug use, myocardial infarction, shock, chronic obstructive pulmonary disease, diabetes mellitus, end-stage renal disease on dialysis, and an ejection fraction less than 30%. Studies were additionally configured in DELTA as follows:

IPTW: Trimming was allowed at the 5th and 95th percentiles and stabilization of weights was enabled. AVS was enabled and the treatment model based on a logit link function.

PSM-Survival: Matching parameters the same as those used in test 1. Additionally, the treatment of interest was DES and the comparator was BMS, the outcome of interest was the occurrence of mortality, and the survival time to event was measured in months.

# 4. Validation Study Results:

Test 1 - Synthetic Dataset Analyses:Descriptive statistics generated by DELTA for Test 1 closely matched the unblinded source synthetic data distributions. As demonstrated in Table S1, the Cloud DELTA analysis was highly accurate, matching 21 of 26 covariates and outcomes with 100% accuracy and 99% for the remaining five.

***Table S1:*** *Accuracy of Cloud DELTA in determination of descriptive statistics for synthetic datasets.*

|  | **DELTA Results** | | | | | **VUMC Source Analysis** | | | | | **Accuracy Calculation** | | | | | **Summary** |
| --- | --- | --- | --- | --- | --- | --- | --- | --- | --- | --- | --- | --- | --- | --- | --- | --- |
|  | **Dataset** | | | | | **Dataset** | | | | | **Dataset** | | | | | **Accuracy** |
| **Covariates** | **1** | **2** | **3** | **4** | **5** | **1** | **2** | **3** | **4** | **5** | **1** | **2** | **3** | **4** | **5** |  |
| Age (Mean) | 66.23 | 66.29 | 65.71 | 65.51 | 66.04 | 66.24 | 66.29 | 65.78 | 65.51 | 66.04 | 1.00 | 1.00 | 1.00 | 1.00 | 1.00 | 1.000 |
| Age (SD) | 14.99 | 14.93 | 14.13 | 13.84 | 14.76 | 14.99 | 14.93 | 14.13 | 13.84 | 14.76 | 1.00 | 1.00 | 1.00 | 1.00 | 1.00 | 1.000 |
| Female | 0.31 | 0.32 | 0.31 | 0.31 | 0.31 | 0.31 | 0.32 | 0.31 | 0.31 | 0.31 | 1.00 | 1.00 | 1.00 | 1.00 | 1.00 | 1.000 |
| BMI (Mean) | 34.32 | 34.29 | 34.27 | 34.27 | 34.29 | 34.32 | 34.29 | 34.27 | 34.27 | 34.29 | 1.00 | 1.00 | 1.00 | 1.00 | 1.00 | 1.000 |
| BMI (SD) | 4.17 | 4.12 | 4.09 | 4.13 | 4.12 | 4.17 | 4.12 | 4.09 | 4.13 | 4.12 | 1.00 | 1.00 | 1.00 | 1.00 | 1.00 | 0.999 |
| Diabetes | 0.32 | 0.33 | 0.33 | 0.34 | 0.33 | 0.32 | 0.33 | 0.33 | 0.34 | 0.33 | 1.00 | 1.00 | 1.00 | 1.00 | 1.00 | 1.000 |
| CLD | 0.14 | 0.14 | 0.13 | 0.14 | 0.14 | 0.14 | 0.14 | 0.13 | 0.14 | 0.14 | 1.00 | 1.00 | 1.00 | 1.00 | 1.00 | 1.000 |
| Hypertension | 0.72 | 0.74 | 0.72 | 0.75 | 0.73 | 0.72 | 0.74 | 0.72 | 0.75 | 0.73 | 1.00 | 1.00 | 1.00 | 1.00 | 1.00 | 1.000 |
| Creatinine (Mean) | 1.95 | 1.96 | 1.96 | 1.96 | 1.95 | 1.95 | 1.96 | 1.96 | 1.96 | 1.96 | 1.00 | 1.00 | 1.00 | 1.00 | 1.00 | 0.998 |
| Creatinine (SD) | 0.64 | 0.65 | 0.64 | 0.65 | 0.65 | 0.64 | 0.65 | 0.64 | 0.65 | 0.65 | 1.00 | 0.99 | 1.00 | 1.00 | 1.00 | 0.997 |
| PAD | 0.10 | 0.10 | 0.09 | 0.10 | 0.10 | 0.10 | 0.10 | 0.09 | 0.10 | 0.10 | 1.00 | 1.00 | 1.00 | 1.00 | 1.00 | 1.000 |
| Emergent | 0.18 | 0.18 | 0.16 | 0.17 | 0.17 | 0.18 | 0.18 | 0.16 | 0.17 | 0.17 | 1.00 | 1.00 | 1.00 | 1.00 | 1.00 | 1.000 |
| Smoker | 0.48 | 0.49 | 0.48 | 0.49 | 0.49 | 0.48 | 0.49 | 0.48 | 0.49 | 0.49 | 1.00 | 1.00 | 1.00 | 1.00 | 1.00 | 1.000 |
| Dialysis | 0.02 | 0.02 | 0.02 | 0.02 | 0.02 | 0.02 | 0.02 | 0.02 | 0.02 | 0.02 | 1.00 | 1.00 | 1.00 | 1.00 | 1.00 | 1.000 |
| NSTEMI Present | 0.19 | 0.19 | 0.19 | 0.18 | 0.19 | 0.19 | 0.19 | 0.19 | 0.18 | 0.19 | 1.00 | 1.00 | 1.00 | 1.00 | 1.00 | 1.000 |
| Prior PCI | 0.22 | 0.22 | 0.23 | 0.24 | 0.22 | 0.22 | 0.22 | 0.23 | 0.24 | 0.22 | 1.00 | 1.00 | 1.00 | 1.00 | 1.00 | 1.000 |
| Aspirin | 0.67 | 0.68 | 0.67 | 0.70 | 0.68 | 0.67 | 0.68 | 0.67 | 0.70 | 0.68 | 1.00 | 1.00 | 1.00 | 1.00 | 1.00 | 1.000 |
| Warfarin | 0.03 | 0.03 | 0.03 | 0.03 | 0.03 | 0.03 | 0.03 | 0.03 | 0.03 | 0.03 | 1.00 | 1.00 | 1.00 | 1.00 | 1.00 | 1.000 |
| Total Admit PCI | 1.01 | 1.00 | 1.00 | 1.01 | 1.00 | 1.01 | 1.00 | 1.00 | 1.01 | 1.00 | 1.00 | 1.00 | 1.00 | 1.00 | 1.00 | 1.000 |
| Fluro. Mins. (Mean) | 16.09 | 16.17 | 16.07 | 16.17 | 16.23 | 16.12 | 16.19 | 16.12 | 16.19 | 16.26 | 1.00 | 1.00 | 1.00 | 1.00 | 1.00 | 0.998 |
| Fluoro. Mins. (SD) | 7.44 | 7.49 | 7.37 | 7.49 | 7.49 | 7.44 | 7.49 | 7.36 | 7.49 | 7.48 | 1.00 | 1.00 | 1.00 | 1.00 | 1.00 | 1.000 |
| PCI Vessels (Mean) | 1.28 | 1.29 | 1.28 | 1.28 | 1.27 | 1.28 | 1.29 | 1.29 | 1.28 | 1.28 | 0.99 | 1.00 | 0.99 | 1.00 | 0.99 | 0.994 |
| Device B | 0.33 | 0.34 | 0.32 | 0.30 | 0.33 | 0.33 | 0.34 | 0.32 | 0.30 | 0.33 | 1.00 | 1.00 | 1.00 | 1.00 | 1.00 | 1.000 |
| **Outcomes** |  | | | | |  | | | | |  | | | | |  |
| Mortality at 30 Days | 0.03 | 0.02 | 0.02 | 0.02 | 0.03 | 0.03 | 0.02 | 0.02 | 0.02 | 0.03 | 1.00 | 1.00 | 1.00 | 1.00 | 1.00 | 1.000 |
| Reoperation | 0.03 | 0.02 | 0.04 | 0.03 | 0.02 | 0.03 | 0.02 | 0.04 | 0.03 | 0.02 | 1.00 | 1.00 | 1.00 | 1.00 | 1.00 | 1.000 |
| Readmission | 0.02 | 0.04 | 0.02 | 0.01 | 0.03 | 0.02 | 0.04 | 0.02 | 0.01 | 0.03 | 1.00 | 1.00 | 1.00 | 1.00 | 1.00 | 1.000 |
| VUMC=Vanderbilt University Medical Center; PAD=Peripheral Arterial Disease; PCI=Percutaneous Coronary Intervention; Fluro Mins=Time under fluoroscopy; PCI Vessels=Number of vessels at index PCI; CLD=Chronic Lung Disease | | | | | | | | | | | | | | | | |

The adjusted odds ratio (OR) or hazard ratio (HR) describing adverse outcomes (mortality, repeat procedure and repeat readmission) attributed to Device A or B were calculated on local and cloud instances of DELTA. Table S2 provides the ratio of odds ratio (or hazard ratio) for each comparison among local DELTA, cloud DELTA, and source data or ‘Truth’, for each of the tested methods. This analysis demonstrated high agreement between the results generated by the local and cloud instances of DELTA, as well as agreement between DELTA results and the unblinded underlying data distributions.

For Test 1, all methods calculated an adjusted OR or HR within 5% of the true value, and descriptive statistics described covariates within 2% of their true values, satisfying all pre-specified validation requirements.

***Table S2****. Accuracy comparisons between local and cloud DELTA instances, and source of truth.*

| **DELTA Method** | **Local Server : Truth** | **Cloud: Server** | **Cloud : Truth** |
| --- | --- | --- | --- |
| Descriptive Statistics | 0.998 | 1.000 | 0.998 |
| LR | 0.998 | 1.000 | 0.998 |
| LR-AVS | 0.997 | 0.999 | 0.998 |
| PSM | 0.947 | 0.967 | 0.945 |
| IPTW | 0.962 | 1.000 | 0.962 |
| WBO | 0.990 | 1.000 | 0.990 |
| SPRT | 1.000 | 1.000 | 1.000 |

Test 2 – Replication of Published Data Analyses: Descriptive statistics generated by DELTA for Test 2 match published data distributions with high accuracy (100% for 10 of 12 covariates, 98%-99% for remaining two), confirming DELTA is capable of successfully ingesting real world data in a cloud environment with high fidelity (see Table S3).

***Table S3.*** *Descriptive statistics comparison between DELTA and published source material.*

| Baseline Characteristics and Risk Factors | DELTA Analysis | | | Published Analysis (Drozda et. al) | | | Accuracy | |
| --- | --- | --- | --- | --- | --- | --- | --- | --- |
| DES Cohort | BMS Cohort | Abs Std Diff | DES Cohort | BMS Cohort | Abs Std Diff |
| n = 1145 | n = 300 | n = 1145 | n = 300 | DES % | BMS % |
| Female | 376 (32.8.%) | 100 (33.3.%) | 0.011 | 376 (32.8.%) | 100 (33.3.%) | 0.011 | 1.00 | 1.00 |
| Age >65 | 600 (52.4.%) | 191 (63.7.%) | 0.226 | 600 (52.4.%) | 191 (63.7.%) | 0.230 | 1.00 | 1.00 |
| Caucasian | 1095 (95.6.%) | 286 (95.3.%) | 0.015 | 1095 (95.6.%) | 286 (95.3.%) | 0.014 | 1.00 | 1.00 |
| Married | 800 (69.9.%) | 168 (56.0.%) | 0.295 | 800 (69.9.%) | 168 (56.0.%) | 0.290 | 1.00 | 1.00 |
| Alcohol Use | 420 (36.7.%) | 90 (30.0.%) | 0.140 | 420 (36.7.%) | 90 (30.0.%) | 0.142 | 1.00 | 1.00 |
| Illicit Drug Use | 67 (5.9.%) | 28 (9.3.%) | 0.141 | 67 (5.9.%) | 28 (9.3.%) | 0.132 | 0.99 | 1.00 |
| Acute MI | 400 (34.9.%) | 163 (54.3.%) | 0.398 | 400 (34.9.%) | 163 (54.3.%) | 0.398 | 1.00 | 1.00 |
| Shock | 21 (1.8.%) | 23 (7.7.%) | 0.340 | 21 (1.8.%) | 23 (7.7.%) | 0.277 | 0.98 | 1.00 |
| COPD | 148 (12.9.%) | 58 (19.3.%) | 0.183 | 148 (12.9.%) | 58 (19.3.%) | 0.175 | 1.00 | 1.00 |
| Diabetes | 435 (38.0.%) | 102 (34.0.%) | 0.083 | 435 (38.0.%) | 102 (34.0.%) | 0.083 | 1.00 | 1.00 |
| Dialysis | 23 (2.0.%) | 8 (2.7.%) | 0.045 | 23 (2.0.%) | 8 (2.7.%) | 0.044 | 1.00 | 1.00 |
| EF <30% | 24 (2.1.%) | 10 (3.3.%) | 0.082 | 24 (2.1.%) | 10 (3.3.%) | 0.076 | 1.00 | 1.00 |

Both IPTW and PSM demonstrated a significant reduction in mortality for patients receiving DES as compared to BMS (0.470, 95% CI 0.328 – 0.668 and 0.500, 95% CI 0.422 – 0.592 respectively), which closely approximated the results from the published study. Figure S1 illustrates the adjusted OR from Drozda along with the results from DELTA for both matched survival analysis and IPTW.

**Figure S1:** *Adjusted hazard ratios from Drozda et al. study and DELTA, demonstrating similar reductions in mortality in patients receiving DES as compared to those receiving BMS*


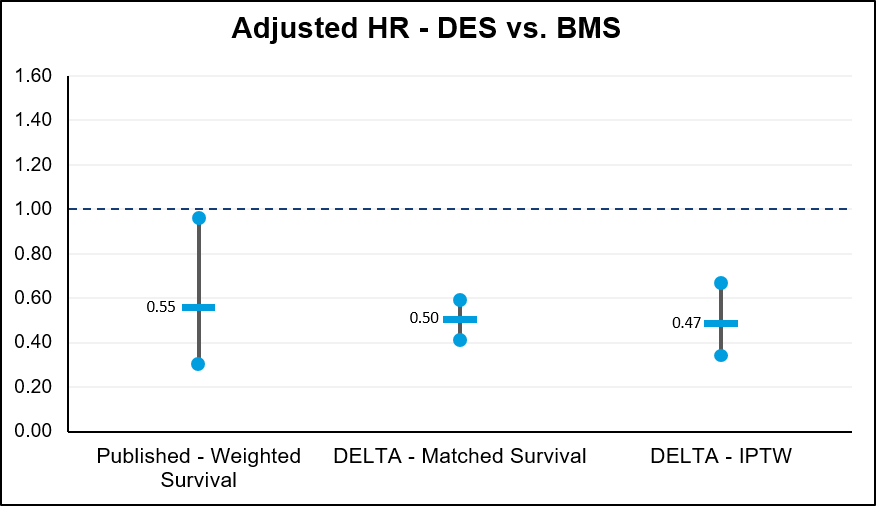


The small discrepancy between DELTA and the results from Drozda et al. can be attributed to differences in propensity weighting methods. IPTW, as implemented within DELTA, seeks to match patients with similar risk from a single population, whereas the Drozda et al. study used a weighting system to generate a hypothetical population of DES patients with the same balance of covariates as the BMS cases. Despite these methodological differences, DELTA was able ascertain the same safety signal as detected by Drozda et al. and therefore satisfy the pre-specified validation requirements.

# 5. References:

1. Resnic FS, Gross TP, Marinac-Dabic D, Loyo-Berrios N, Donnelly S, Normand SLT & Matheny ME. Automated surveillance to detect post-procedure safety signals of approved medical devices. *JAMA.* 2010 Nov 10; 304(18): 2019-2028.
2. Resnic FS, Majithia A, Marinac-Dabic D, Robbins S, Ssemaganda, Hewitt K, Ponirakis A, Loyo-Berrios N, Moussa I, Drozda J, Normand SL & Matheny ME. Registry-Based Prospective Active Medical Device Safety Surveillance. *N Engl J Med*. 2017 Feb 9; 376(6):526-535.
3. Resnic FS, Majithia A, Dhruva SS, Ssemaganda H, Robbins S, Marinac-Dabic D, Hewitt K, Ohno-Machado L, Reynolds M and Matheny ME. Active Surveillance of the ICD Registry for Defibrillator Lead Failures. *Circ Cardiovasc Qual Outcomes.* 2020 April;13(4)
4. Kumar A, Matheny ME, Ho KK, Yeh RW, Piemonte TC, Waldman H, Shah PB, Cope R, Normand SL, Donnelly S, Robbins S & Resnic FS. The Data Extraction and Longitudinal Trend Analysis Network Study of Distributed Automated Postmarket Cardiovascular Device Safety Surveillance. *Circ Cardiovasc Qual Outcomes*. 2015 Jan;8(1)38-46
5. Frankenberger EA, Resnic FS, Ssemaganda H, Robbins S, Dunbar MR, Coplan P, Zhang S, Bruno C, Maltenfort M, Benedetti JB, Matheny ME and Ghogawala Z. Evaluation of intervertebral body implant performance using active surveillance of electronic health records. *BMJ Surg Interv Health Technol*. 2022 Jul 8; 4(1).
6. Schober, P., & Vetter, T. R. (2021). Logistic Regression in Medical Research. *Anesthesia and analgesia*, *132*(2), 365–366. <https://doi.org/10.1213/ANE.0000000000005247>
7. Tibshirani R.. 1996. Regression shrinkage and selection via the lasso. *Journal of the Royal Statistical Society: Series B (Methodological)* 58, 1 (1996), 267–288.
8. Rosenbaum, P., Rubin, D., The central role of the propensity score in observational studies for causal effects, Biometrika, Volume 70, Issue 1, April 1983, Pages 41–55, <https://doi.org/10.1093/biomet/70.1.41>
9. Garrido, M. M., Kelley, A. S., Paris, J., Roza, K., Meier, D. E., Morrison, R. S., & Aldridge, M. D. (2014). Methods for constructing and assessing propensity scores. Health services research, 49(5), 1701–1720. https://doi.org/10.1111/1475-6773.12182
10. Hirano K, Imbens G, Ridder G. Efficient estimation of average treatment effects using the estimated propensity score. Econometrica. 2003; 71:1161–1189. doi:10.1111/1468-0262.00442.
11. Harder, V. S., Stuart, E. A., & Anthony, J. C. (2010). Propensity score techniques and the assessment of measured covariate balance to test causal associations in psychological research. *Psychological methods*, *15*(3), 234–249. https://doi.org/10.1037/a0019623
12. Austin P. C. (2011). Optimal caliper widths for propensity-score matching when estimating differences in means and differences in proportions in observational studies. *Pharmaceutical statistics*, *10*(2), 150–161. <https://doi.org/10.1002/pst.433>.
13. Wang, Y., Cai, H., Li, C., Jiang, Z., Wang, L., Song, J., & Xia, J. (2013). Optimal caliper width for propensity score matching of three treatment groups: a Monte Carlo study. *PloS one*, *8*(12), e81045. <https://doi.org/10.1371/journal.pone.0081045>.
14. Robins, J. M., Hernán, M. A., & Brumback, B. (2000). Marginal structural models and causal inference in epidemiology. *Epidemiology (Cambridge, Mass.)*, *11*(5), 550–560. <https://doi.org/10.1097/00001648-200009000-00011>
15. Spiegelhalter, D., Grigg, O., Kinsman, R., & Treasure, T. (2003). Risk-adjusted sequential probability ratio tests: applications to Bristol, Shipman and adult cardiac surgery. International journal for quality in health care : journal of the International Society for Quality in Health Care, 15(1), 7–13. <https://doi.org/10.1093/intqhc/15.1.7>
16. Matheny, M. E., Normand, S. L., Gross, T. P., Marinac-Dabic, D., Loyo-Berrios, N., Vidi, V. D., Donnelly, S., & Resnic, F. S. (2011). Evaluation of an automated safety surveillance system using risk adjusted sequential probability ratio testing. *BMC Medical Informatics and Decision Making*, *11*, 75. <https://doi.org/10.1186/1472-6947-11-75>
17. Goel, M. K., Khanna, P., & Kishore, J. (2010). Understanding survival analysis: Kaplan-Meier estimate. *International journal of Ayurveda research*, *1*(4), 274–278. <https://doi.org/10.4103/0974-7788.76794>
18. Drozda, J., Zeringue, A., Dummitt, B., Yount, B., & Resnic, F. (2020). How real-world evidence can really deliver: a case study of data source development and use. *BMJ surgery, interventions, & health technologies*, *2*(1), e000024. https://doi.org/10.1136/bmjsit-2019-000024
